# Supplementary material for: Neuroprotective effects of macamide from maca (Lepidium meyeniiWalp.) on corticosterone-induced hippocampal impairments through its anti-inflammatory, neurotrophic, and synaptic protection properties
Source: Royal Society of Chemistry journal article supplement (doi:10.1039/d1fo01720a), 2021-01-01
Supplement: d1fo01720a1.pdf [file d1fo01720a1.pdf]

**Table S1** Chromatographic conditions.

| Time (min) | Water<br>(0.1% Formic acid) | Acetonitrile<br>(0.1% Formic acid) |
|------------|-----------------------------|------------------------------------|
| 0          | 95                          | 5                                  |
| 3.5        | 85                          | 15                                 |
| 6.0        | 70                          | 30                                 |
| 6.5        | 70                          | 30                                 |
| 12.0       | 30                          | 70                                 |
| 12.5       | 30                          | 70                                 |
| 18.0       | 0                           | 100                                |
| 25.0       | 0                           | 100                                |
