# Supplementary material for: Neuroprotective effects of macamide from maca (Lepidium meyeniiWalp.) on corticosterone-induced hippocampal impairments through its anti-inflammatory, neurotrophic, and synaptic protection properties
Source: Royal Society of Chemistry journal article supplement (doi:10.1039/d1fo01720a), 2021-01-01
Supplement: d1fo01720a2.pdf [file d1fo01720a2.pdf]

**Table S2** The prediction of blood-brain barrier (BBB) permeability of compounds in maca.

| Name                                                        | ADMET_BBB_Level | ADMET_AlogP98 | ADMET_PSA_2D |
|-------------------------------------------------------------|-----------------|---------------|--------------|
| N-benzyl-9-oxo-12Z,15Z-octadecadienamide                    | 0               | 6.155         | 47.411       |
| 5-Oxo-6E,8E-octadecadienoic acid                            | 1               | 5.414         | 55.417       |
| N-benzyl-9,16-dioxo-10E,12E,14E-octadecatrienamide          | 1               | 5.130         | 64.712       |
| N-benzyl-16(S)-hydroxy-9-oxo-10E,12E,14E-octadecatrienamide | 1               | 5.030         | 68.227       |
| N-benzyl-9Z,12Z,15Z-octadecatrienamide                      | 1               | 3.905         | 30.111       |
| N-(3-methoxybenzyl)-9Z,12Z,15Z-octadecatrienamide           | 1               | 3.888         | 39.041       |
| Macapyrrolin A                                              | 1               | 2.645         | 31.579       |
| Macapyrrolin B                                              | 2               | 2.403         | 52.394       |
| Macapyrrolin C                                              | 2               | 2.237         | 43.464       |
| 1,2-Dihydro-N-hydroxypyridine derivative (macaridine)       | 2               | 1.715         | 41.468       |
| 1R,3S-1-methyltetrahydro-β-carboline-3-carboxylic acid      | 3               | 1.915         | 65.981       |
| N-(3,4-dimethoxybenzyl)-hexadecanamide                      | 4               | 7.522         | 47.971       |
| N-benzyl-9-oxo-12Z-octadecenamide                           | 4               | 6.599         | 47.411       |
| N-benzyl-5-oxo-6E,8E-octadecadienamide                      | 4               | 6.576         | 47.411       |
| N-benzyl-9-oxo-10E,12E-octadecadienamide                    | 4               | 6.576         | 47.411       |
| N-benzyl-9-oxo-10E,12Z-octadecadienamide                    | 4               | 6.576         | 47.411       |
| N-benzyl-13-oxo-9E,11E-octadecadienamide                    | 4               | 6.576         | 47.411       |
| N-(3-methoxybenzyl)-octadecanamide                          | 4               | 8.450         | 39.041       |
| N-(3-methoxybenzyl)-9Z-octadecenamide                       | 4               | 8.006         | 39.041       |
| N-(3-methoxybenzyl)-hexadecanamide                          | 4               | 7.538         | 39.041       |
| N-(3-methoxybenzyl)-9Z,12Z-octadecadienamide                | 4               | 7.117         | 39.041       |
| N-benzyl-tetracosanamide                                    | 4               | 11.204        | 30.111       |
| N-benzyl-15Z-tetracosenamide                                | 4               | 10.759        | 30.111       |
| N-benzyl-octadecanamide                                     | 4               | 8.467         | 30.111       |

---

|                            |   |       |        |
|----------------------------|---|-------|--------|
| N-benzyl-9Z-octadecenamide | 4 | 8.444 | 30.111 |
|----------------------------|---|-------|--------|

---

Table S2 (continued)

| Name                                                                 | ADMET_BBB_Level | ADMET_AlogP98 | ADMET_PSA_2D |
|----------------------------------------------------------------------|-----------------|---------------|--------------|
| N-benzyl-heptadecanamide                                             | 4               | 8.011         | 30.111       |
| N-benzyl-hexadecanamide                                              | 4               | 7.554         | 30.111       |
| N-benzyl-9Z,12Z-octadecadienamide                                    | 4               | 7.133         | 30.111       |
| N-benzyl-pentadecanamide                                             | 4               | 7.098         | 30.111       |
| $\beta$ -Sitosterol                                                  | 4               | 8.084         | 20.815       |
| Stigmasterol                                                         | 4               | 7.639         | 20.815       |
| Campesterol                                                          | 4               | 7.627         | 20.815       |
| Brassicasterol                                                       | 4               | 7.431         | 20.815       |
| Ergosteryl                                                           | 4               | 7.183         | 20.815       |
| Tricin 4'-O-[threo- $\beta$ -guaiacyl-(7''-O-methyl)-glyceryl] ether | 4               | 3.315         | 154.143      |
| Tricin 4'-O-(erythro- $\beta$ -guaiacyl-glyceryl) ether              | 4               | 2.907         | 166.028      |
| Glucobrassicin                                                       | 4               | -0.613        | 179.402      |
| 4-Methoxyglucobrassicin                                              | 4               | -0.629        | 188.333      |
| Glucotropaeolin                                                      | 4               | -0.906        | 164.347      |
| p-Methoxybenzyl glucosinolate                                        | 4               | -0.923        | 173.277      |
| Glucolimnanthin                                                      | 4               | -0.923        | 173.277      |
| Glucobrassicinapin                                                   | 4               | -0.961        | 164.347      |
| m-Hydroxybenzyl glucosinolate                                        | 4               | -1.148        | 185.163      |
| Glucosinalbin                                                        | 4               | -1.148        | 185.163      |
| Glucoalyssin                                                         | 4               | -2.210        | 181.648      |
